# Supplementary material
Source: PubMed Central journal article supplement (PMC4755443)
Supplement: supp_dev330_dev330supp_table2.pdf [file supp_dev330_dev330supp_table2.pdf]

**Supplementary Table SII** Patterns of specific factor reporting among infertility cases.

| Overall infertility | Ovulatory disorder | Spousal factor | Tubal factor | Endometriosis | Cervical mucous | Number of reports |
|---------------------|--------------------|----------------|--------------|---------------|-----------------|-------------------|
|                     | 0                  | 0              | 0            | 0             | 0               | 1674              |
|                     |                    | 0              | 0            | 0             | 0               | 263               |
|                     | 0                  |                | 0            | 0             | 0               | 211               |
|                     | 0                  | 0              |              | 0             | 0               | 64                |
|                     | 0                  | 0              | 0            |               | 0               | 90                |
|                     | 0                  | 0              | 0            | 0             |                 | 30                |
|                     | 0                  | 0              | 0            |               |                 | 2                 |
|                     | 0                  | 0              |              | 0             |                 | 2                 |
|                     | 0                  | 0              |              |               | 0               | 22                |
|                     | 0                  |                | 0            | 0             |                 | 5                 |
|                     | 0                  |                | 0            |               | 0               | 16                |
|                     | 0                  |                |              | 0             | 0               | 7                 |
|                     | 0                  |                |              | 0             |                 | 1                 |
|                     | 0                  |                |              |               | 0               | 2                 |
|                     |                    | 0              | 0            | 0             |                 | 17                |
|                     |                    | 0              | 0            |               | 0               | 20                |
|                     |                    | 0              | 0            |               |                 | 5                 |
|                     |                    | 0              |              | 0             | 0               | 17                |
|                     |                    | 0              |              |               | 0               | 7                 |
|                     |                    |                | 0            | 0             | 0               | 42                |
|                     |                    |                | 0            | 0             |                 | 2                 |
|                     |                    |                | 0            |               | 0               | 5                 |
|                     |                    |                |              | 0             | 0               | 2                 |
|                     |                    |                |              | 0             |                 | 1                 |
|                     |                    |                |              |               | 0               | 1                 |
