# Supplementary material
Source: PubMed Central journal article supplement (PMC4755443)
Supplement: supp_dev330_dev330supp_table4.pdf [file supp_dev330_dev330supp_table4.pdf]

**Supplementary Table SIV Hazard ratios (HR) and 95% confidence intervals (CI) of primary or secondary spousal factor indicated infertility risk by distance to road and particulate matter (PM) exposure from September 1993 to December 2003, among 36 294 women in the Nurses' Health Study II.**

| Exposure                                            | Primary infertility (nulliparous) |                                 |                                         | Secondary infertility (parous) |                                       |                                         |
|-----------------------------------------------------|-----------------------------------|---------------------------------|-----------------------------------------|--------------------------------|---------------------------------------|-----------------------------------------|
|                                                     | Cases                             | Basic HR<br>95% CI <sup>a</sup> | Multivariable HR<br>95% CI <sup>b</sup> | Cases                          | Basic crude HR<br>95% CI <sup>a</sup> | Multivariable HR<br>95% CI <sup>b</sup> |
| Distance to A1–A3 roads (m)                         |                                   |                                 |                                         |                                |                                       |                                         |
| 0–199                                               | 100                               | 0.99<br>(0.75–1.31)             | 1.01<br>(0.76–1.34)                     | 34                             | 1.02<br>(0.66–1.57)                   | 1.02<br>(0.66–1.59)                     |
| 200+                                                | 106                               | 1.00<br>(referent)              | 1.00<br>(referent)                      | 55                             | 1.00<br>(referent)                    | 1.00<br>(referent)                      |
| 2-year average (10 µg/m <sup>3</sup> )              |                                   |                                 |                                         |                                |                                       |                                         |
| PM <sub>10</sub>                                    | 206                               | 1.25<br>(0.99–1.58)             | 1.27<br>(1.00–1.61)                     | 89                             | 0.97<br>(0.66–1.43)                   | 0.94<br>(0.64–1.39)                     |
| PM <sub>2.5–10</sub>                                | 206                               | 1.28<br>(0.89–1.84)             | 1.31<br>(0.90–1.89)                     | 89                             | 0.89<br>(0.48–1.64)                   | 0.83<br>(0.45–1.55)                     |
| PM <sub>2.5</sub>                                   | 206                               | 1.54<br>(0.98–2.43)             | 1.56<br>(0.99–2.48)                     | 89                             | 1.06<br>(0.52–2.16)                   | 1.05<br>(0.51–2.15)                     |
| 4-year average (10 µg/m <sup>3</sup> )              |                                   |                                 |                                         |                                |                                       |                                         |
| PM <sub>10</sub>                                    | 206                               | 1.07<br>(0.82–1.41)             | 1.09<br>(0.83–1.43)                     | 89                             | 0.96<br>(0.62–1.47)                   | 0.94<br>(0.61–1.44)                     |
| PM <sub>2.5–10</sub>                                | 206                               | 1.09<br>(0.72–1.65)             | 1.12<br>(0.74–1.70)                     | 89                             | 0.86<br>(0.44–1.67)                   | 0.80<br>(0.41–1.57)                     |
| PM <sub>2.5</sub>                                   | 206                               | 1.11<br>(0.67–1.84)             | 1.15<br>(0.69–1.90)                     | 89                             | 1.08<br>(0.49–2.36)                   | 1.09<br>(0.49–2.40)                     |
| Cumulative average exposure (10 µg/m <sup>3</sup> ) |                                   |                                 |                                         |                                |                                       |                                         |
| PM <sub>10</sub>                                    | 206                               | 1.28<br>(1.02–1.60)             | 1.28<br>(1.02–1.60)                     | 89                             | 0.76<br>(0.52–1.12)                   | 0.73<br>(0.50–1.08)                     |
| PM <sub>2.5–10</sub>                                | 206                               | 1.27<br>(0.90–1.77)             | 1.26<br>(0.90–1.78)                     | 89                             | 0.67<br>(0.37–1.22)                   | 0.62<br>(0.34–1.13)                     |
| PM <sub>2.5</sub>                                   | 206                               | 1.72<br>(1.11–2.68)             | 1.71<br>(1.10–2.67)                     | 89                             | 0.72<br>(0.36–1.42)                   | 0.70<br>(0.35–1.39)                     |

Note: Primary infertility is defined as cases occurring among nulliparous women, and secondary infertility is defined as cases occurring among previously parous women.

<sup>a</sup>Adjusted for age (in months), race (white, black, other race), calendar year, and region (Northeast, Midwest, West, South).

<sup>b</sup>Additionally adjusted for current BMI (continuous), smoking status (current, former, never, missing), OC use (never, past, current, missing), age at menarche (< 10, 10, 11, 12, 13, 14, 15, 16, 17, missing), overall diet quality (alternate healthy eating index, continuous), history of rotating shift work (ever, never), and Census tract level median income (continuous) and median home value (continuous).
